# Supplementary material for: Morphology of the Female Reproductive System of the Soybean Thrips, Neohydatothrips variabilis (Beach, 1896) (Thysanoptera: Thripidae)
Source: MDPI journal article supplement (doi:10.3390/insects13070566), 2022-06-23
Supplement: s1 [file s1]

**Supplementary Materials:**

**Table S1.** Terminologies used in the paper.

| <b>Abbreviation</b> | <b>English Terminology</b>                          | <b>German Translation of the terminology</b> | <b>Terminology first proposed by</b> |
|---------------------|-----------------------------------------------------|----------------------------------------------|--------------------------------------|
| ADR                 | Appendage gland                                     | Anhangsdrüse                                 | Bode [29]                            |
| V1                  | 1st gonapophysis or 1st valvula                     |                                              | Snodgrass [35],[36]                  |
| V2                  | 2nd gonapophysis/ 2nd valvula                       |                                              | Snodgrass [35],[36]                  |
| 1.Vf                | 1st Valvifer                                        |                                              | Snodgrass [35],[36]                  |
| 2. Vf               | 2nd Valvifer                                        |                                              | Snodgrass [35],[36]                  |
| AP                  | Apodeme                                             |                                              | Snodgrass [35],[36]                  |
| FOC                 | follicle cells                                      |                                              | Snodgrass [35],[36]                  |
| ET                  | Epithelial layer                                    |                                              | Snodgrass [35],[36]                  |
| NC                  | Nutrition cells                                     |                                              | Snodgrass [35],[36]                  |
| Yo                  | Yolk                                                |                                              | Snodgrass [35],[36]                  |
| MO                  | Matured oocytes                                     |                                              | Snodgrass [35],[36]                  |
| IO                  | Immature oocytes                                    |                                              | Snodgrass [35],[36]                  |
| GC                  | gland cell                                          | einzelnen Drüsenzellen                       | Bode [29]                            |
| WC                  | Wall cell                                           | Wandzellen                                   | Bode [29]                            |
| SK                  | skin cells                                          | Sockel cells                                 | Bode [29]                            |
| BM                  | Membrane cells                                      | Wand cells                                   | Bode [29]                            |
| BV1                 | Basivalvulae 1                                      | Basivalvulae 1                               | Snodgrass [35],[36]                  |
| BV2                 | Basivalvulae 2                                      | Basivalvulae 2                               | Snodgrass [35]                       |
| KZ                  | Channel cells                                       | K+ anal Zellen                               | Bode [29]                            |
| DZ                  | Glandular cells                                     | Drusen zellen                                | Bode [29]                            |
| Ag                  | ADR gland opening                                   |                                              | Bode [29]                            |
| EP                  | Epiproct                                            |                                              | Snodgrass [35]                       |
| PP                  | Paraproct                                           |                                              | Snodgrass [35]                       |
| Ovipositor shaft    | Anatomical cluster composed of 1st and 2nd valvulae |                                              | Snodgrass [35],[36]                  |

**Table S2.** Muscles annotation and terminologies proposed.

| Muscle name                                                      | Muscle type | Tergite | Muscle originat<br>e                | Muscle insert                                          | Equivalent muscle names |                                       |           |                     |
|------------------------------------------------------------------|-------------|---------|-------------------------------------|--------------------------------------------------------|-------------------------|---------------------------------------|-----------|---------------------|
|                                                                  |             |         |                                     |                                                        | Snodgras [35]           | Davies [34]                           | Bode [29] | Zhou and Rédei [37] |
| <b>Muscle spermathecal basivalvula</b>                           | Unbranched  | VII     | Dorsal to the spermatheca           | Inserted into the basivalvulae of the ovipositor shaft |                         |                                       |           |                     |
| <b>Inter tergite muscle 8</b>                                    | Unbranched  | VIII    | VII                                 | VIII                                                   |                         | i.t.vlv8<br>Inter tergite muscle 8    | 1b        |                     |
| <b>outer tergal valvilis 8</b>                                   | Unbranched  | VIII    | antero lateral corner of 8th tergum | Valvilis                                               |                         | outer tergal valvilis 8<br>(o.t.vlv8) | 1a        |                     |
| <b>Muscle ovary oviducts ADR gland</b>                           | Mooag       |         | Ovary                               | oviduct, spermatheca                                   |                         |                                       |           |                     |
| <b>Muscle latero tergo postero Appendage gland 7 (ltpagm7b1)</b> | Branched    | VII     | Tergum                              | ADR gland                                              |                         |                                       |           |                     |
|                                                                  | lptagmb1    | VII     | Tergum                              | ADR gland                                              |                         |                                       |           |                     |
|                                                                  | lptagmb2    | VII     | Tergum                              | ADR gland                                              |                         |                                       |           |                     |
|                                                                  | lptagmb3    | VII     | Tergum                              | ADR gland                                              |                         |                                       |           |                     |
|                                                                  | lptagmb4    | VII     | Tergum                              | ADR gland                                              |                         |                                       |           |                     |
|                                                                  | lptagmb5    | VII     | Tergum                              | ADR gland                                              |                         |                                       |           |                     |

|                                           |                                    |     |                                       |                                                              |       |    |       |
|-------------------------------------------|------------------------------------|-----|---------------------------------------|--------------------------------------------------------------|-------|----|-------|
| <b>Tergo spermatheca muscle</b>           | Branched                           | VII | Tergum                                | Spermatheca                                                  |       |    |       |
|                                           | tsm1                               | VII | Tergum                                | SM2 and SM3                                                  |       |    |       |
|                                           | tsm2                               | VII | Tergum                                | SM3                                                          |       |    |       |
|                                           | Atsmpts                            | VII | Spermatheca                           | SM2                                                          |       |    |       |
| <b>Spermatheca basivalvulae muscle</b>    | Unbranched Sbm                     | VII | Spermatheca                           | Basivalvula                                                  |       |    |       |
| <b>Muscle spermatheca and vagina</b>      | Msv                                | VII | Spermatheca                           | ADR gland & Vagina                                           |       |    |       |
| <b>Muscle tergo- valvilis posterior 9</b> | Branched (ovm1, ovm2, ovm3 & ovm4) | IX  | Tergum                                | Valvula ovipositor                                           | p.dv9 | 10 | mtvp9 |
|                                           | ovm1                               | IX  | Tergum                                | 2 <sup>nd</sup> valvifier                                    |       |    |       |
|                                           | ovm2                               | IX  | Tergum                                | 2 <sup>nd</sup> valvifier and attached laterally to the OVM1 |       |    |       |
|                                           | ovm3                               | IX  | Posteriorly attached to the Tergum 10 | Attached with OVM2 and OVM4                                  |       |    |       |
|                                           | ovm4                               | IX  | Posteriorly attached to the           | Attached with OVM3 and valvulae laterally and                |       |    |       |

|                                            |            |      |                                       |                                                                                           |                                     |    |                                    |
|--------------------------------------------|------------|------|---------------------------------------|-------------------------------------------------------------------------------------------|-------------------------------------|----|------------------------------------|
|                                            |            |      | Tergum 10                             | inserted into the 2 <sup>nd</sup> valvifier                                               |                                     |    |                                    |
|                                            | ovm5       |      | Posteriorly attached to the Tergum 10 | Attached with OVM3 and valvulae laterally and inserted into the 2 <sup>nd</sup> valvifier |                                     |    |                                    |
| <b>Muscle tergo-valvilis primus 8</b>      | Mtv        | VIII | Tergum                                | Apodeme plate 8                                                                           |                                     |    | Muscle tergo-valvilis primus 8mtv8 |
| <b>Tergo valvilis medial 10</b>            | Unbranched | X    | Tergum                                | 2 <sup>nd</sup> valvula tip                                                               | Transverse tergosternal ts10        | 16 | Tergo valvilis medial 10           |
| <b>Muscle longitudinal inter-tergite X</b> | Unbranched | X    | Transverse tergite 11                 | Tergite 9                                                                                 | Muscle longitudinal inter-tergite X | 15 |                                    |
